# Supplementary material for: Barriers to and Facilitators of Engagement With Remote Measurement Technology for Managing Health: Systematic Review and Content Analysis of Findings
Source: PubMed Central journal article supplement (PMC6062692; doi:10.2196/10480), 2018-07-12
Supplement: jmir_v20i7e10480_app1.pdf [file jmir_v20i7e10480_app1.pdf]

**Appendix 1.** Search strategy for barriers and facilitators to engagement with RMT.

| <b>Search line</b> | <b>Search terms</b>                                                                                    | <b>Filtered by</b> |
|--------------------|--------------------------------------------------------------------------------------------------------|--------------------|
| 1                  | Exp Telemedicine/                                                                                      | Title/Abstract     |
| 2                  | ((remot\$ or distance\$) adj5 (monitor\$ or sens\$ or track\$ or check\$))                             | Title/Abstract     |
| 3                  | (mobil\$ adj3 (comput\$ or techno\$ or health\$ or devic\$))                                           | Title/Abstract     |
| 4                  | (m-health or mhealth or ((digital\$ or pervas\$) adj2 health\$))                                       | Title/Abstract     |
| 5                  | ((1 or 2 or 3 or 4) adj5 (facilitat\$ or barrier\$ or challenge\$ or engag\$ or accept\$ or feasib\$)) | Title/Abstract     |
