# Supplementary material for: Barriers to and Facilitators of Engagement With Remote Measurement Technology for Managing Health: Systematic Review and Content Analysis of Findings
Source: PubMed Central journal article supplement (PMC6062692; doi:10.2196/10480), 2018-07-12
Supplement: jmir_v20i7e10480_app2.pdf [file jmir_v20i7e10480_app2.pdf]

Facilitators and barriers to engagement in Active RMT.

|                               | Original articles 2014-2017                               |  |   |   |                       |                        |  |   |   |                          |   |
|-------------------------------|-----------------------------------------------------------|--|---|---|-----------------------|------------------------|--|---|---|--------------------------|---|
|                               | Reported by service users                                 |  |   |   |                       |                        |  |   |   |                          |   |
| Factors                       |                                                           |  |   |   | Dicianno et al (2016) | Engelhard et al (2017) |  |   |   | Westergaard et al (2017) |   |
| Health status                 | Exacerbations in condition, eg, requiring hospitalization |  |   |   |                       |                        |  |   |   | -                        |   |
|                               | Difficulties with vision                                  |  |   |   |                       |                        |  |   |   | -                        |   |
| Usability                     | Clear, simple, and informative                            |  | + |   |                       |                        |  |   |   |                          |   |
|                               | Short battery life                                        |  |   |   |                       |                        |  |   |   | -                        |   |
|                               | Technical malfunctions                                    |  |   |   |                       | -                      |  | - | - | -                        |   |
|                               | Speed of system                                           |  |   |   |                       |                        |  |   |   |                          |   |
|                               | Size of screen or device                                  |  |   |   |                       |                        |  |   | + |                          |   |
|                               | Lost or damaged devices                                   |  |   | - | -                     |                        |  |   |   |                          |   |
|                               | Changes to service plans                                  |  |   |   |                       |                        |  |   |   |                          | - |
| Convenience and accessibility | Passive data collection                                   |  |   |   |                       |                        |  |   |   |                          |   |
|                               | Forgetfulness of the user                                 |  |   |   |                       |                        |  |   |   | -                        |   |
|                               | Presence and timing of notifications                      |  |   |   |                       | +/                     |  |   |   | +                        |   |
|                               | Familiarity and knowledge                                 |  |   |   |                       | -                      |  |   |   | +                        |   |
