# Supplementary material for: Barriers to and Facilitators of Engagement With Remote Measurement Technology for Managing Health: Systematic Review and Content Analysis of Findings
Source: PubMed Central journal article supplement (PMC6062692; doi:10.2196/10480), 2018-07-12
Supplement: jmir_v20i7e10480_app3.pdf [file jmir_v20i7e10480_app3.pdf]

|                                               |                                              |   |  |   |   |   |  |   |  |   |   |   |  |   |
|-----------------------------------------------|----------------------------------------------|---|--|---|---|---|--|---|--|---|---|---|--|---|
|                                               | Access to internet connection                |   |  |   |   | + |  | + |  |   |   |   |  |   |
|                                               | Poor phone network coverage                  |   |  |   |   | - |  |   |  |   |   |   |  |   |
|                                               | Tailored or personalized                     |   |  |   |   |   |  |   |  | + |   |   |  |   |
|                                               | Available training or support                |   |  |   |   |   |  | + |  |   |   |   |  |   |
| <b>Perceived utility &amp; value: rewards</b> | Feedback                                     | + |  | + |   |   |  |   |  |   |   |   |  | + |
|                                               | Incentives or social comparison              | + |  | + | + |   |  |   |  |   | + |   |  |   |
| <b>Perceived utility &amp; value: costs</b>   | Financial costs                              |   |  |   |   |   |  |   |  |   | - |   |  |   |
|                                               | Impact on privacy or security                |   |  |   |   |   |  |   |  |   |   |   |  |   |
|                                               | Poor data reliability                        |   |  |   |   |   |  | - |  |   |   |   |  |   |
| <b>Motivation</b>                             | Lack of intrinsic motivation to learn or use | - |  |   |   |   |  | - |  |   |   | - |  |   |
|                                               | Influence of clinicians/extrinsic motivation |   |  |   |   |   |  |   |  |   |   | - |  |   |
