# Supplementary material for: Barriers to and Facilitators of Engagement With Remote Measurement Technology for Managing Health: Systematic Review and Content Analysis of Findings
Source: PubMed Central journal article supplement (PMC6062692; doi:10.2196/10480), 2018-07-12
Supplement: jmir_v20i7e10480_app5.pdf [file jmir_v20i7e10480_app5.pdf]

## Characteristics of the original studies included in the systematic review.

### Sources of reported barriers/facilitators:

Quantitative Sources    
  Qualitative Sources    
  Mixed Method Sources

| First author, year, reference | Country | Population                                             | Participant Characteristics                                                                                                                                               | Description of RMT device                                                                                                                                                                                        | Type of RMT        | Length of trial | Quantitative Sources               | Qualitative Sources | Quality assessment (0 - 1) |
|-------------------------------|---------|--------------------------------------------------------|---------------------------------------------------------------------------------------------------------------------------------------------------------------------------|------------------------------------------------------------------------------------------------------------------------------------------------------------------------------------------------------------------|--------------------|-----------------|------------------------------------|---------------------|----------------------------|
| Aranki, 2016 [18]             | USA     | Chronic Heart Condition                                | Male (n = 8)<br>Female (n = 7)<br>Age not specified                                                                                                                       | A smartphone app encompassing internal sensors to monitor energy expenditure, and daily surveys of cardiovascular symptoms (e.g. fatigue and dizziness) and vital signs (e.g. heartbeat rate and blood pressure) | Active and Passive | 6 weeks         | Usage statistics;<br>Questionnaire | N/A                 | 0.25                       |
| Ben-Zeev, 2014 [8]            | USA     | Psychosis                                              | Male (n = 20)<br>Female (n = 13)<br>Age (Mean = 45.9, SD = 8.78)                                                                                                          | <i>FOCUS</i> : smartphone apps and online dashboard using ecological momentary assessment (EMA) of current status (e.g. mood) with tailored feedback and interventions                                           | Active             | 1 month         | Usage statistics;<br>Questionnaire | N/A                 | 0.75                       |
| Ben-Zeev, 2016 [13]           | USA     | Psychosis                                              | Male (n = 213)<br>Female (n = 129)<br>Age: 18-60                                                                                                                          | <i>FOCUS</i> : smartphone apps and online dashboard using ecological momentary assessment (EMA) of current status (e.g. mood) with tailored feedback and interventions                                           | Active             | 6 months        | Usage statistics                   | N/A                 | 0.75                       |
| Buchem, 2015 [34]             | Germany | Maintaining health and well-being amongst older adults | Male (n = 10)<br>Female (n = 10)<br>Age not specified                                                                                                                     | <i>fMOOC</i> : mobile app and pedometer, with educational and gamification (e.g. badges) components                                                                                                              | Passive            | 4 weeks         | Usage statistics;<br>Questionnaire | N/A                 | 0.25                       |
| Dicianno, 2016 [14]           | USA     | Spina Bifida                                           | <b>Intervention</b><br>Male (n = 8)<br>Female (n = 5)<br>Age (Mean = 29.7, SD = 5)<br><br><b>Control</b><br>Male (n = 5)<br>Female (n = 5)<br>Age (Mean = 29.5, SD = 6.8) | <i>iMHere</i> : mobile- and web-based PROMs (e.g. mood, physical independence and self-management skills), monitoring of medication adherence, and skin damage reports/image uploads                             | Active             | 12 months       | Usage statistics                   | N/A                 | 0.75                       |

|                       |         |                                                        |                                                                                                                                                      |                                                                                                                                                                                                          |                    |           |                  |     |      |
|-----------------------|---------|--------------------------------------------------------|------------------------------------------------------------------------------------------------------------------------------------------------------|----------------------------------------------------------------------------------------------------------------------------------------------------------------------------------------------------------|--------------------|-----------|------------------|-----|------|
| Ding, 2016 [29]       | USA     | Maintaining health and well-being                      | Male (n = 10)<br>Female (n = 6)<br>Age: 18-25                                                                                                        | WalkMore: mobile- and smart watch-based monitoring of physical activity, with motivational reminders                                                                                                     | Passive            | 4 weeks   | Questionnaire    | N/A | 0.5  |
| Engelhard, 2017 [9]   | USA     | Multiple Sclerosis                                     | Male (n = 2)<br>Female (n = 29)<br>Age: (Median = 48, 27-61)                                                                                         | Web-based PROMs (e.g. fatigue, walking impairment and leisure-time exercise habits) and web portal                                                                                                       | Active             | 6 months  | Usage statistics | N/A | 0.75 |
| Hardinge, 2015 [6]    | UK      | COPD                                                   | Male (n = 9)<br>Female (n = 9)<br>Age: 40-90                                                                                                         | Tablet-based daily symptom diaries assessing general well-being, cough and sputum production (quantity and color), and breathlessness, a wireless pulse oximeter, and personalized self-management plans | Active and passive | 6 months  | Usage statistics | N/A | 1    |
| Huang, 2015 [28]      | Taiwan  | Maintaining health and well-being amongst older adults | Male (n = 29)<br>Female (n = 22)<br>Age: 50-94                                                                                                       | Mobile-pad and smartphone-based assessments of physical (e.g. hearing, speech, vision and nutrition) and mental (e.g. cognition and mood) health status                                                  | Active             | 6 weeks   | Questionnaire    | N/A | 0.25 |
| Jonassaint, 2015 [10] | USA     | Sickle Cell Disease                                    | Male (n = 9)<br>Female (n = 6)<br>Age: (Mean = 29, 16-54)                                                                                            | SMART: smartphone-based recording of pain intensity and clinical symptoms                                                                                                                                | Active             | 28 days   | Usage statistics | N/A | 0.5  |
| Juengst, 2015 [23]    | USA     | Traumatic Brain Injury                                 | Male (n = 12)<br>Female (n = 8)<br>Age: (Mean = 36.7, SD = 12.4, 22-60)                                                                              | iPerform: smartphone-based EMA of affect, anxiety and fatigue                                                                                                                                            | Active             | 8 weeks   | Questionnaire    | N/A | 0.75 |
| Leonard, 2017 [24]    | USA     | Sickle Cell Disease and $\beta$ -thalassemia major     | <b>Patients</b><br>Male (n = 4)<br>Female (n = 7)<br>Age: (Mean = 12.4, SD = 3.8, 8-21)<br><b>Caregivers</b><br>n = 1 (gender and age not specified) | Self-recorded videos of therapy (iron chelation) administration, uploaded to a remote service via a smartphone or tablet app                                                                             | Active             | 6 months  | Usage statistics | N/A | 0.75 |
| Lind, 2016 [38]       | S3weden | Heart Failure                                          | Male (n = 11)<br>Female (n = 3)<br>Age: (Mean = 84, SD = 5.6, 75-95)                                                                                 | Daily PROMs (e.g. shortness of breath, weight, blood pressure and oxygen saturation) recorded via digital pen-and-paper                                                                                  | Active             | 13 months | Questionnaire    | N/A | 0.5  |

|                      |           |                                                                 |                                                                                                                                                                                |                                                                                                                                                             |                    |                |                                 |                            |      |
|----------------------|-----------|-----------------------------------------------------------------|--------------------------------------------------------------------------------------------------------------------------------------------------------------------------------|-------------------------------------------------------------------------------------------------------------------------------------------------------------|--------------------|----------------|---------------------------------|----------------------------|------|
| McClure, 2016 [12]   | USA       | Smoking Cessation                                               | <b>Intervention</b><br>Male (n = 14)<br>Female (n = 19)<br>Age: (Mean = 48.4, SD = 8.4)<br><b>Controls</b><br>Male (n = 15)<br>Female (n = 18)<br>Age: (Mean = 50.6, SD = 8.9) | MyMAP: check-in surveys to report current symptoms and side effects completed via a mobile-based program                                                    | Active             | 5 months       | Usage statistics; Questionnaire | N/A                        | 0.5  |
| Mundi, 2015 [33]     | USA       | Pre-bariatric Surgery                                           | <b>At enrolment</b><br>Male (n = 3)<br>Female (n = 27)<br>Age: (Mean = 41.3, SD = 11.4)<br><br><b>Study Completion</b><br>N = 20 (gender and age not specified)                | Smartphone-based EMA of physical activity and dietary intake, with motivational and educational components                                                  | Active             | 12 weeks       | Questionnaire                   | N/A                        | 0.5  |
| Piotrowicz, 2014 [7] | Poland    | Cardiovascular Disease                                          | Male (n = 307)<br>Female (n = 58)<br>Age: (Mean = 58.3, SD = 10.5)                                                                                                             | Tele-electrocardiogram (ECG)-monitoring transmitted via a mobile phone to a monitoring center                                                               | Active             | 4 weeks        | Usage statistics; Questionnaire | N/A                        | 1    |
| Price, 2014 [17]     | USA       | PTSD                                                            | Male (n = 17)<br>Female (n = 14)<br>Age: (Mean = 37.1, SD = 9.8)                                                                                                               | Daily SMS-based assessments of social support, hypervigilance, avoidance, re-experiencing and pain                                                          | Active             | 15 days        | Usage statistics; Questionnaire | N/A                        | 0.5  |
| Spring, 2017 [27]    | USA       | Obesity                                                         | Male (n = 15)<br>Female (n = 81)<br>Age: (Mean = 39.3, SD = 11.7)                                                                                                              | Monitoring of dietary intake, body weight and physical activity via a smartphone app and accelerometer (n=32)                                               | Active and Passive | 6 months       | Usage statistics                | N/A                        | 0.75 |
| Anderson, 2016 [32]  | Australia | Chronic health conditions and Maintaining health and well-being | Male (n = 7)<br>Female (n = 15)<br>Age: 18- >55                                                                                                                                | A variety of health apps for physical (e.g. blood pressure, diabetes and migraine) and mental (e.g. anxiety) health, with most requiring weekly interaction | Active and Passive | Single Session | N/A                             | Semi-structured interviews | 0.75 |
| Fontil, 2016 [21]    | USA       | Diabetes                                                        | Male (n = 8)<br>Female (n = 10)<br>Age: (Mean = 53)                                                                                                                            | <i>The Omada Health Program</i> : wireless weight scales and pedometer, with online group support and personalized coaching                                 | Active and Passive | 4 weeks        | N/A                             | Focus Groups               | 0.75 |

|                             |             |                                                |                                                                                                                                                                   |                                                                                                                                                                                            |                    |                                                     |                                 |                            |      |
|-----------------------------|-------------|------------------------------------------------|-------------------------------------------------------------------------------------------------------------------------------------------------------------------|--------------------------------------------------------------------------------------------------------------------------------------------------------------------------------------------|--------------------|-----------------------------------------------------|---------------------------------|----------------------------|------|
| Maglalan, 2017 [25]         | USA         | Type 2 Diabetes                                | Male (n = 17)<br>Female (n = 28)<br>Age: (Mean = 57.6, SD = 9.8)                                                                                                  | <i>PilAm Go4Health</i> : physical activity, calorie intake and weight recorded via a Fitbit                                                                                                | Active and Passive | 6 months                                            | N/A                             | Semi-structured interviews | 0.75 |
| Peng, 2016 [30]             | USA         | Type 2 Diabetes                                | Male (n = 5)<br>Female (n = 13)<br>Age: (Mean = 54, SD = 12.7)                                                                                                    | Four apps (Glucose Buddy, mySugr, MyFitnessPal and MapMyWalk) with features including activity tracking, goal setting and peer support                                                     | Active and Passive | Single Session                                      | N/A                             | Focus Groups               | 0.75 |
| Randriambelonoro, 2017 [26] | Switzerland | Diabetes and Obesity                           | Male (n = 7)<br>Female (n = 11)<br>Age: 36-73                                                                                                                     | <i>FitBit One</i> : activity monitor, daily food log and SMS reminders                                                                                                                     | Active and Passive | 7 months                                            | N/A                             | Semi-structured interviews | 0.5  |
| Westergaard, 2017 [37]      | USA         | HIV and Substance Use Disorders                | <b>At enrolment</b><br>Male (n = 12)<br>Female (n = 7)<br>Age: (Median = 49.3, IQR = 45-54.6)<br><b>Study Completion</b><br>N = 15 (gender and age not specified) | <i>mPeer2Peer</i> : smartphone-based EMA of symptoms and behaviors (e.g. drug and alcohol cravings, usage and mood)                                                                        | Active             | 9 months                                            | N/A                             | Semi-structured interviews | 0.75 |
| Al Ayubi, 2014 [31]         | USA         | Maintaining health and well-being              | Male (n = 3)<br>Female (n = 10)<br>Age: (Mean = 32.2, SD = 5.6, 24-45)                                                                                            | <i>PersonA</i> : smartphone with internal accelerometer to monitor physical activity, and online platform (Facebook) for social support                                                    | Passive            | 4 weeks (social interaction introduced in week two) | Questionnaires                  | Semi-structured interviews | 0.25 |
| Cushing, 2016 [20]          | USA         | Asthma                                         | Male (n = 2)<br>Female (n = 5)<br>Age: (Mean = 14.1, 11-18)                                                                                                       | <i>Mobile asthma management system</i> : an inhaler sensor and mobile app to monitor medication adherence and send reminders                                                               | Passive            | 12 weeks                                            | Usage statistics                | Focus Groups               | 0.5  |
| Dale, 2015 [11]             | New Zealand | Chronic Heart Condition                        | Male (n = 69)<br>Female (n = 16)<br>Age: (Mean = 61.4, SD = 9)                                                                                                    | Step count monitoring via a pedometer, with goal setting and motivational components via text messaging and a web site                                                                     | Active             | 24 weeks                                            | Usage statistics; Questionnaire | Semi-structured Interviews | 0.75 |
| Eisenhauer, 2017 [15]       | USA         | Maintaining health and well-being in rural men | Male (n = 12)<br>Age: 40-66                                                                                                                                       | <i>FitBit One</i> : wearable activity monitor and companion mobile app to record daily dietary intake, and issue SMS reminders                                                             | Active and Passive | 3 weeks                                             | Usage statistics; Questionnaire | Semi-structured Interviews | 0.5  |
| Evangelista, 2015 [19]      | USA         | Chronic heart problems                         | Male (n = 10)<br>Female (n = 11)<br>Age: (Mean = 73.1, SD = 9.2)                                                                                                  | Monitoring of physical health parameters (e.g., weight, blood pressure, and heart rate) via a wireless device, daily symptom assessment questionnaires via SMS, disease related alerts and | Active and Passive | 12 weeks                                            | Usage statistics                | Semi-structured Interviews | 0.5  |

|                       |        |                                                        |                                                                                                                                                                                                  |                                                                                                                                                                 |         |                         |                                 |                            |      |
|-----------------------|--------|--------------------------------------------------------|--------------------------------------------------------------------------------------------------------------------------------------------------------------------------------------------------|-----------------------------------------------------------------------------------------------------------------------------------------------------------------|---------|-------------------------|---------------------------------|----------------------------|------|
| Hartzler, 2016 [22]   | USA    | Type-2 Diabetes or Major Depressive Disorder           | <p><b>Diabetes</b><br/>Male (n = 2)<br/>Female (n = 6)<br/>Age: (Mean = 71, SD = 5, 63-77)</p> <p><b>Depression</b><br/>Male (n = 5)<br/>Female (n = 2)<br/>Age: (Mean = 63, SD = 12, 36-73)</p> | reminders, and computer assisted personal interviews<br><i>NutriWalking</i> : mobile-based activity and nutrition log, with personalized goals and peer support | Active  | Single Session          | Questionnaire                   | Semi-structured interviews | 0.5  |
| Ho, 2015 [36]         | Canada | Type-2 Diabetes                                        | <p><b>Patients (n = 39)</b><br/>Gender and age not specified)</p> <p><b>Caregivers (n = 28)</b><br/>Gender and age not specified)</p>                                                            | mDAWN: wireless blood pressure monitor, weight scale and glucose meter, with educational and social support via SMS and a web-portal                            | Active  | 3 months                | Questionnaire                   | Semi-structured interviews | 0.25 |
| Naslund, 2015 [16]    | USA    | Serious Mental Illness                                 | <p>Male (n = 1)<br/>Female (n = 9)<br/>Age: (Mean = 47.7, SD = 9, 30-58)</p>                                                                                                                     | Wearable activity tracking/accelerometer devices (FitBit Zip or Nike Inc. FuelBand) wirelessly synced to smartphone devices                                     | Passive | Between 80 and 133 days | Usage Statistics                | Semi-structured interviews | 0.25 |
| Vathsangam, 2014 [35] | USA    | Maintaining health and well-being amongst older adults | <p>Female (n = 8)<br/>Age: (Mean = 74, SD = 11, 61-88)</p>                                                                                                                                       | <i>Strive</i> : physical activity monitored via an accelerometer smartphone app                                                                                 | Passive | 3 weeks                 | Usage Statistics; Questionnaire | Focus Group                | 0.25 |

---
